# Supplementary material
Source: HighWire-hosted journal article supplement (https://erj.ersjournals.com/content/61/4/2201237)

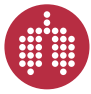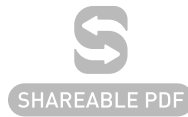

# *Mycobacterium avium* complex genomics and transmission in a London hospital

Andries J. van Tonder <sup>1</sup>, Huw C. Ellis<sup>2,3</sup>, Colin P. Churchward<sup>3</sup>, Kartik Kumar <sup>2,3</sup>, Newara Ramadan <sup>4</sup>, Susan Benson<sup>4</sup>, Julian Parkhill<sup>1</sup>, Miriam F. Moffatt<sup>3,5</sup>, Michael R. Loebinger<sup>2,3,5</sup> and William O.C. Cookson<sup>2,3,5</sup>

<sup>1</sup>Department of Veterinary Medicine, University of Cambridge, Cambridge, UK. <sup>2</sup>Host Defence Unit, Department of Respiratory Medicine, Royal Brompton Hospital, Guy's and St Thomas' NHS Foundation Trust, London, UK. <sup>3</sup>National Heart and Lung Institute, Imperial College London, London, UK. <sup>4</sup>Department of Microbiology, Royal Brompton Hospital, Guy's and St Thomas' NHS Foundation Trust, London, UK. <sup>5</sup>These three authors contributed equally.

Corresponding author: Julian Parkhill ([jp369@cam.ac.uk](mailto:jp369@cam.ac.uk))

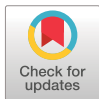

Shareable abstract (@ERSpublications)

Transmission of *Mycobacterium avium* complex (MAC) species is indirect and may involve environmental intermediates or asymptomatic carriage in the wider population <https://bit.ly/3FQWqnF>

**Cite this article as:** van Tonder AJ, Ellis HC, Churchward CP, *et al.* *Mycobacterium avium* complex genomics and transmission in a London hospital. *Eur Respir J* 2023; 61: 2201237 [DOI: 10.1183/13993003.01237-2022].

This single-page version can be shared freely online.

Copyright ©The authors 2023.

This version is distributed under the terms of the Creative Commons Attribution Licence 4.0.

This article has an editorial commentary:  
<https://doi.org/10.1183/13993003.00308-2023>

Received: 22 June 2022  
Accepted: 23 Oct 2022

## Abstract

**Background** Non-tuberculous mycobacteria (NTM) are environmental microorganisms and opportunistic pathogens in individuals with pre-existing lung conditions such as cystic fibrosis (CF) and non-CF bronchiectasis. While recent studies of *Mycobacterium abscessus* have identified transmission within single CF centres as well as nationally and globally, transmission of other NTM species is less well studied.

**Methods** To investigate the potential for transmission of the *Mycobacterium avium* complex (MAC) we sequenced 996 isolates from 354 CF and non-CF patients at the Royal Brompton Hospital (London, UK; collected 2013–2016) and analysed them in a global context. Epidemiological links were identified from patient records. Previously published genomes were used to characterise global population structures.

**Results** We identified putative transmission clusters in three MAC species, although few epidemiological links could be identified. For *M. avium*, lineages were largely limited to single countries, while for *Mycobacterium chimaera*, global transmission clusters previously associated with heater-cooler units (HCUs) were found. However, the immediate ancestor of the lineage causing the major HCU-associated outbreak was a lineage already circulating in patients.

**Conclusions** CF and non-CF patients shared transmission chains, although the lack of epidemiological links suggested that most transmission is indirect and may involve environmental intermediates or asymptomatic carriage in the wider population.

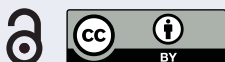

Supplement: inline-supplementary-material-4 [file inline-supplementary-material-4.pdf]
