# Supplementary material
Source: HighWire-hosted journal article supplement (https://erj.ersjournals.com/content/61/4/2201237)
Supplement: inline-supplementary-material-1 [file inline-supplementary-material-1.pdf]

## **Supplementary Text S1 - Detailed methods**

### *Consent/ethics*

The study (access to patients' clinical data) was approved by the NHS Health Research Authority (HRA) and Health and Care Research Wales (HCRW) (REC reference 21/HRA/2554).

### *Culturing, DNA extraction and sequencing*

Sputum samples were grown in BBL MGIT media (Becton Dickinson; BD) in a BACTEC MGIT 960 (BD) culture system until the system indicated likely Mycobacterial growth. NTM species confirmation was performed using the GenoTypeMycobacterium CM VER 2.0 (Hain Lifescience) System. Confirmed MAC cultures were regrown from bead stock cultures in BBL MGIT media (BD) in a BACTEC MGIT 960 (BD) culture system until the system indicated growth. In the absence of growth, DNA was extracted from the bead stock. DNA extractions were performed as previously described (<https://dx.doi.org/10.17504/protocols.io.bf28jqhw>). A total of 1189 DNA extracts were sequenced by the core pipeline teams at the Wellcome Sanger Institute.

Clinical data pertaining to patients from whom NTM cultures were isolated were collected from electronic health records at the RBH. Data included patients' sex, age at the time of first positive NTM culture, height, weight, lung function test results, comorbidities, medication history and date of death (where applicable). Anonymization was undertaken by removing personal data, including patients' hospital numbers, prior to analysis.

### *Sequence QC, mapping and phylogenetics*

Basic quality control metrics for the raw sequence data were generated using FastQC v0.11.9 [1]. Sequence reads with similarity to *Mycobacterium* species were identified using Kraken v0.10.6 [2] and Bracken v1.0 [3]. Samples with < 70% reads mapping to a *Mycobacterium* species were excluded from further analyses (n = 116). Seven isolates not belonging to the MAC (*M. abscessus*, *M. chelonae*, *M. simiae*) were removed from the dataset. Sequence reads for each species were trimmed using Trimmomatic v0.33 [4] and mapped to appropriate references (supplementary table 1) using BWA mem v0.7.17 (minimum and maximum insert sizes of 50 bp and 1000 bp respectively) [5]. Single nucleotide polymorphisms (SNPs) were called using SAMtools v1.2 mpileup and BCFtools v1.2 (minimum base call quality of 50 and minimum root squared mapping quality of 30) as previously described [6]. Samples with reads that mapped to < 80% of the reference were excluded (n = 70). Variant sites were extracted from the resulting alignments using snp-sites v2.5.1 [7]. Whole species maximum likelihood phylogenetic trees were built using IQ-tree v1.6.5 accounting for constant sites (-fconst; determined using snp-sites -C) with the built-in model testing (-m MFP) to determine the best phylogenetic model and 1000 ultrafast bootstraps (-bb 1000) [8].

For higher-resolution phylogenies within fastBAPS lineages, recombinant regions were identified and removed from alignments using GUBBINS [9] and new phylogenetic trees were constructed as described above. Pairwise SNP distances were calculated for all pairs of isolates using pairsnp [10].

### *Global collections*

To provide context for each the isolates sequenced for each species in this study, datasets consisting of published sequenced isolates were assembled (Supplementary File 3) [11–31]. Sequence data were downloaded from the European Nucleotide Archive (ENA) and trimmed;

Sample QC, mapping and phylogenetic tree construction were performed as detailed above. Only the first isolate from each patient was included from the RBH isolates for each species/subspecies.

### *Genome assemblies*

A previously published pipeline was used to produce annotated assemblies [32]. Briefly, sequence reads were assembled with spades v 3.10.10 [33] and assemblies were improved by first scaffolding the assembled contigs using SSPACE v2.0 [34] and filling the sequence gaps with GapFiller v1.11 [35].

### *Transmission and epidemiological linkage*

Genomic lineages were identified using fastBAPS [36] and new alignments were created for lineages  $\geq$  ten isolates by aligning sequence reads for included isolates against the assembly that had the smallest number of contigs (using the method described above). In order to calculate a pairwise SNP threshold to determine putative transmission clusters within each genomic lineage, pairwise SNP distances for all isolates for each species in the RBH datasets were calculated. Using a previously described method [37], the transmission threshold for each species, regardless of lineage, was calculated by taking the 95<sup>th</sup> percentile of the maximum within-patient isolate pairwise SNP distances for all patients and adding twice the number of mutations expected to occur in a six month period. To account for excess within-patient diversity observed in the *M. chimaera* FB1 and *M. avium* subsp. *avium* FB14 lineages (Fig A in S1 Data), pairwise SNP distances greater than 25 and 50 (assumed to result from infection with multiple lineages) were removed respectively before the above calculations were performed. Based on these results, the R library iGRAPH [38,39] and pairwise SNP thresholds of 16 (*M. intracellulare* and *M. avium* subsp. *hominissuis*), 30 (*M. chimaera*) and

58 SNPs (*M. avium* subsp. *avium*) were used to calculate putative transmission clusters in each genomic lineage. Finally, in order to identify possible epidemiological links between patients infected within the same transmission clusters, hospital stay records were examined for epidemiological contacts. The latter were defined as patients attending the same ward on the same day up to one year prior to the collection of the first sequenced isolate.

## References

1. Babraham Bioinformatics. FastQC A Quality Control tool for High Throughput Sequence Data. [www.bioinformatics.babraham.ac.uk/projects/fastqc/](http://www.bioinformatics.babraham.ac.uk/projects/fastqc/) Date last updated: December 14 2021. Date last accessed: December 14 2021.
2. Wood DE, Salzberg SL. Kraken: ultrafast metagenomic sequence classification using exact alignments. *Genome Biol* 2014; 15: R46.
3. Lu J, Breitwieser FP, Thielen P *et al.* Bracken: estimating species abundance in metagenomics data. *PeerJ Comput Sci* 2017; 3: e104.
4. Bolger AM, Lohse M, Usadel B. Trimmomatic: a flexible trimmer for Illumina sequence data. *Bioinformatics* 2014; 30: 2114–20.
5. Li H, Durbin R. Fast and accurate short read alignment with Burrows-Wheeler transform. *Bioinformatics* 2009; 25: 1754–60.
6. Harris SR, Feil EJ, Holden MTG *et al.* Evolution of MRSA during hospital transmission and intercontinental spread. *Science* 2010; 327: 469–74.
7. Page AJ, Taylor B, Delaney AJ *et al.* SNP-sites: rapid efficient extraction of SNPs from multi-FASTA alignments. *Microb Genomics* 2016; 2: e000056.
8. Nguyen L-T, Schmidt HA, von Haeseler A, *et al.* IQ-TREE: a fast and effective stochastic algorithm for estimating maximum-likelihood phylogenies. *Mol Biol Evol* 2015; 32: 268–74.
9. Croucher NJ, Page AJ, Connor TR *et al.* Rapid phylogenetic analysis of large samples of recombinant bacterial whole genome sequences using Gubbins. *Nucleic Acids Res* 2015; 43: e15.
10. Tonkin-Hill G. pairsnp. <https://github.com/gtonkinhill/pairsnp>. Date last updated: December 2021. Date last accessed: December 14 2021 .
11. van Ingen J, Kohl TA, Kranzer K *et al.* Global outbreak of severe *Mycobacterium chimaera* disease after cardiac surgery: a molecular epidemiological study. *Lancet Infect Dis* 2017; 17: 1033–41.

12. Caverly LJ, Spilker T, LiPuma JJ. Complete Genome Sequence of *Mycobacterium abscessus* subsp. *bolletii*. *Genome Announc* 2016; 4: e00543-16.
13. Hasan NA, Davidson RM, Epperson LE *et al.* Population Genomics of Nontuberculous Mycobacteria Recovered from United States Cystic Fibrosis Patients. *bioRxiv* 2019; 663559.
14. Bryant JM, Thibault VC, Smith DGE *et al.* Phylogenomic exploration of the relationships between strains of *Mycobacterium avium* subspecies *paratuberculosis*. *BMC Genomics* 2016; 17: 79.
15. Lande L, Alexander DC, Wallace RJ *et al.* *Mycobacterium avium* in Community and Household Water, Suburban Philadelphia, Pennsylvania, USA, 2010-2012. *Emerg Infect Dis* 2019; 25: 473–81.
16. Yoon J-K, Kim TS, Kim J-I *et al.* Whole genome sequencing of Nontuberculous Mycobacterium (NTM) isolates from sputum specimens of co-habiting patients with NTM pulmonary disease and NTM isolates from their environment. *BMC Genomics* 2020; 21: 322.
17. Votintseva AA, Pankhurst LJ, Anson LW *et al.* Mycobacterial DNA extraction for whole-genome sequencing from early positive liquid (MGIT) cultures. *J Clin Microbiol* 2015; 53: 1137–43.
18. Pfeiffer W, Braun J, Burchell J *et al.* Whole-genome analysis of mycobacteria from birds at the San Diego Zoo. *PloS One* 2017; 12: e0173464.
19. Quan TP, Bawa Z, Foster D *et al.* Evaluation of Whole-Genome Sequencing for Mycobacterial Species Identification and Drug Susceptibility Testing in a Clinical Setting: a Large-Scale Prospective Assessment of Performance against Line Probe Assays and Phenotyping. *J Clin Microbiol* 2018; 56: e01480-17.
20. Operario DJ, Pholwat S, Koeppel AF *et al.* *Mycobacterium avium* Complex Diversity within Lung Disease, as Revealed by Whole-Genome Sequencing. *Am J Respir Crit Care Med* 2019; 200: 393–6.
21. Rivas AE, Hollinger C, Oehler DA *et al.* DIAGNOSIS AND MANAGEMENT OF MYCOBACTERIOSIS IN A COLONY OF LITTLE PENGUINS (*EUDYPTULA MINOR*). *J Zoo Wildl Med Off Publ Am Assoc Zoo Vet* 2019; 50: 427–36.
22. Chand M, Lamagni T, Kranzer K *et al.* Insidious Risk of Severe *Mycobacterium chimaera* Infection in Cardiac Surgery Patients. *Clin Infect Dis Off Publ Infect Dis Soc Am* 2017; 64: 335–42.
23. Pankhurst LJ, Del Ojo Elias C, Votintseva AA *et al.* Rapid, comprehensive, and affordable mycobacterial diagnosis with whole-genome sequencing: a prospective study. *Lancet Respir Med* 2016; 4: 49–58.
24. Epperson LE, Timke M, Hasan NA *et al.* Evaluation of a Novel MALDI Biotyper Algorithm to Distinguish *Mycobacterium intracellulare* From *Mycobacterium chimaera*. *Front Microbiol* 2018; 9: 3140.

25. Acosta F, Pérez-Lago L, Ruiz Serrano MJ *et al.* Fast update of undetected *Mycobacterium chimaera* infections to reveal unsuspected cases. J Hosp Infect 2018; 100: 451–5.
26. Ghodousi A, Borroni E, Peracchi M *et al.* Genomic analysis of cardiac surgery-associated *Mycobacterium chimaera* infections in Italy. PloS One 2020; 15: e0239273.
27. Mac Aogáin M, Roycroft E, Raftery P *et al.* Draft Genome Sequences of Three *Mycobacterium chimaera* Respiratory Isolates. Genome Announc 2015; 3: e01409-15.
28. Perkins KM, Lawsin A, Hasan NA *et al.* Notes from the Field: *Mycobacterium chimaera* Contamination of Heater-Cooler Devices Used in Cardiac Surgery - United States. MMWR Morb Mortal Wkly Rep 2016; 65: 1117–8.
29. Svensson E, Jensen ET, Rasmussen EM *et al.* *Mycobacterium chimaera* in Heater-Cooler Units in Denmark Related to Isolates from the United States and United Kingdom. Emerg Infect Dis 2017; 23: 507–9.
30. Williamson D, Howden B, Stinear T. *Mycobacterium chimaera* Spread from Heating and Cooling Units in Heart Surgery. N Engl J Med 2017; 376: 600–2.
31. Zhang X, Lin J, Feng Y *et al.* Identification of *Mycobacterium chimaera* in heater-cooler units in China. Sci Rep 2018; 8: 7843.
32. Page AJ, De Silva N, Hunt M *et al.* Robust high-throughput prokaryote de novo assembly and improvement pipeline for Illumina data. Microb Genomics 2016; 2: e000083.
33. Bankevich A, Nurk S, Antipov D *et al.* SPAdes: a new genome assembly algorithm and its applications to single-cell sequencing. J Comput Biol J Comput Mol Cell Biol 2012; 19:455–77.
34. Boetzer M, Henkel CV, Jansen HJ *et al.* Scaffolding pre-assembled contigs using SSPACE. Bioinformatics 2011; 27: 578–9.
35. Boetzer M, Pirovano W. Toward almost closed genomes with GapFiller. Genome Biol 2012; 13: R56.
36. Tonkin-Hill G, Lees JA, Bentley SD *et al.* Fast hierarchical Bayesian analysis of population structure. Nucleic Acids Res 2019; 47: 5539–49.
37. Coll F, Raven KE, Knight GM *et al.* Definition of a genetic relatedness cutoff to exclude recent transmission of methicillin-resistant *Staphylococcus aureus*: a genomic epidemiology analysis. Lancet Microbe 2020; 1: e328–35.
38. R Core Team. R: A language and environment for statistical computing. 2013.
39. Csardi G, Nepusz T. The Igraph Software Package for Complex Network Research. InterJournal 2005; Complex Systems:1695.

Supplementary Table 1. Reference genomes used in this study.

| Species/<br>subspecies                       | Reference  | Length (Mb) | Country of<br>isolation | Year(s) of<br>isolation |
|----------------------------------------------|------------|-------------|-------------------------|-------------------------|
| <i>M. intracellulare</i>                     | ATCC 13950 | 5.4         | South<br>Korea          | 2012                    |
| <i>M. avium</i> subsp. <i>avium</i>          | 104        | 5.5         | USA                     | 1983                    |
| <i>M. avium</i> subsp.<br><i>hominissuis</i> | TH135      | 5.0         | Japan                   | 2004-2008               |
| <i>M. chimaera</i>                           | DSM 44623  | 5.9         | Italy                   | 1999-2003               |

Supplementary Table 2. *Mycobacterium intracellulare* transmission clusters

| fastBAP<br>S cluster | Transmissio<br>n cluster | Patient<br>s (n) | Bronchiectas<br>is (n) | Cystic<br>Fibrosi<br>s (n) | Other<br>lung<br>condition<br>s (n) | No pre-<br>existing<br>lung<br>conditio<br>n (n) | Patients<br>undergoi<br>ng<br>treatment<br>(n) |
|----------------------|--------------------------|------------------|------------------------|----------------------------|-------------------------------------|--------------------------------------------------|------------------------------------------------|
| Mi_FB2               | Mi_FB2_1                 | 2                | 0                      | 2                          | 0                                   | 0                                                | 1                                              |
| Mi_FB3               | Mi_FB3_1                 | 16               | 8                      | 7                          | 1                                   | 0                                                | 4                                              |
| Mi_FB5               | Mi_FB5_1                 | 3                | 2                      | 0                          | 1                                   | 0                                                | 2                                              |

Supplementary Table 3. *M. avium* subsp. *avium* transmission clusters

| fastBAPS<br>cluster | Transmissio<br>n cluster | Patien<br>ts (n) | Bronchiecta<br>sis (n) | Cystic<br>Fibros<br>is (n) | Other<br>lung<br>conditio | No pre-<br>existing<br>lung | Patients<br>undergoi<br>ng |
|---------------------|--------------------------|------------------|------------------------|----------------------------|---------------------------|-----------------------------|----------------------------|
|---------------------|--------------------------|------------------|------------------------|----------------------------|---------------------------|-----------------------------|----------------------------|

|              |                |    |   |   | ns (n) | conditio<br>n (n) | treatment<br>(n) |
|--------------|----------------|----|---|---|--------|-------------------|------------------|
| MAA_FB<br>5  | MAA_FB5_<br>1  | 10 | 6 | 2 | 2      | 0                 | 4                |
| MAA_FB<br>5  | MAA_FB5_<br>4  | 2  | 1 | 1 | 0      | 0                 | 0                |
| MAA_FB<br>5  | MAA_FB5_<br>5  | 2  | 1 | 0 | 1      | 0                 | 1                |
| MAA_FB<br>5  | MAA_FB5_<br>12 | 2  | 1 | 1 | 0      | 0                 | 1                |
| MAA_FB<br>7  | MAA_FB7_<br>1  | 2  | 2 | 0 | 0      | 0                 | 1                |
| MAA_FB<br>10 | MAA_FB10<br>_1 | 2  | 0 | 2 | 0      | 0                 | 0                |
| MAA_FB<br>14 | MAA_FB14<br>_1 | 2  | 2 | 0 | 0      | 0                 | 1                |

Supplementary Table 4. *M. avium* subsp. *hominissuis* transmission clusters

| fastBAPS<br>cluster | Transmissio<br>n cluster | Patien<br>ts (n) | Bronchiecta<br>sis (n) | Cystic<br>Fibros<br>is (n) | Other<br>lung<br>conditio<br>ns (n) | No pre-<br>existing<br>lung<br>conditio<br>n (n) | Patients<br>undergoi<br>ng<br>treatment<br>(n) |
|---------------------|--------------------------|------------------|------------------------|----------------------------|-------------------------------------|--------------------------------------------------|------------------------------------------------|
| MAH_FB              | MAH_FB8_                 | 16               | 7                      | 4                          | 3                                   | 1                                                | 0                                              |

|              |                |   |   |   |   |   |   |
|--------------|----------------|---|---|---|---|---|---|
| 8            | 1              |   |   |   |   |   |   |
| MAH_FB<br>10 | MAH_FB10<br>_1 | 4 | 2 | 2 | 0 | 0 | 1 |
| MAH_FB<br>11 | MAH_FB11<br>_1 | 6 | 3 | 1 | 2 | 0 | 0 |
| MAH_FB<br>12 | MAH_FB12<br>_2 | 4 | 1 | 2 | 1 | 0 | 2 |
| MAH_FB<br>14 | MAH_FB14<br>_3 | 4 | 2 | 2 | 0 | 0 | 0 |
| MAH_FB<br>14 | MAH_FB14<br>_7 | 2 | 0 | 2 | 0 | 0 | 0 |
| MAH_FB<br>14 | MAH_FB14<br>_9 | 7 | 3 | 2 | 1 | 0 | 1 |

Supplementary Table 5. *Mycobacterium chimaera* transmission clusters

| fastBAP<br>S cluster | Transmissio<br>n cluster | Patient<br>s (n) | Bronchiectas<br>is (n) | Cystic<br>Fibrosi<br>s (n) | Other<br>lung<br>conditio<br>s (n) | No pre-<br>existing<br>lung<br>conditio<br>n (n) | Patients<br>undergoin<br>g<br>treatment<br>(n) |
|----------------------|--------------------------|------------------|------------------------|----------------------------|------------------------------------|--------------------------------------------------|------------------------------------------------|
| Mc_FB3               | Mc_FB3_1                 | 106              | 43                     | 24                         | 25                                 | 3                                                | 15                                             |
| Mc_FB3               | Mc_FB3_3                 | 2                | 1                      | 1                          | 0                                  | 0                                                | 0                                              |
| Mc_FB3               | Mc_FB3_4                 | 2                | 2                      | 0                          | 0                                  | 0                                                | 0                                              |
| Mc_FB3               | Mc_FB3_6                 | 2                | 1                      | 0                          | 1                                  | 0                                                | 0                                              |
| Mc_FB3               | Mc_FB3_1                 | 4                | 1                      | 1                          | 1                                  | 1                                                | 1                                              |

|        |               |   |   |   |   |   |   |
|--------|---------------|---|---|---|---|---|---|
|        | 3             |   |   |   |   |   |   |
| Mc_FB3 | Mc_FB3_1<br>6 | 2 | 0 | 0 | 1 | 1 | 1 |
| Mc_FB3 | Mc_FB3_1<br>7 | 2 | 1 | 1 | 0 | 0 | 0 |
| Mc_FB3 | Mc_FB3_1<br>9 | 2 | 0 | 1 | 0 | 1 | 0 |
| Mc_FB3 | Mc_FB3_2<br>5 | 2 | 1 | 1 | 0 | 0 | 1 |
| Mc_FB3 | Mc_FB3_3<br>0 | 4 | 0 | 1 | 0 | 0 | 0 |
| Mc_FB4 | Mc_FB4_1      | 2 | 1 | 1 | 0 | 0 | 1 |
| Mc_FB4 | Mc_FB4_2      | 9 | 3 | 3 | 3 | 0 | 2 |
| Mc_FB4 | Mc_FB4_3      | 6 | 1 | 2 | 2 | 0 | 1 |

Supplementary Table 6. *Mycobacterium chimaera* epidemiological links (n =15 patients)

| Patients with epidemiological link | Hospital ward | Dates of overlapping stay |
|------------------------------------|---------------|---------------------------|
| 24/218                             | FOUL          | 02/02/12-12/02/12         |
| 163/218                            | FOUL          | 13/02/12                  |
| 175/218                            | FOUL          | 05/04/12-16/04/12         |
| 130/218                            | LIND          | 30/04/12                  |
| 76/218                             | FOUL          | 06/06/12-11/06/12         |
| 32/163                             | LIND          | 29/06/12                  |

|             |      |                   |
|-------------|------|-------------------|
| 79/241      | LIND | 05/07/12          |
| 241/272     | LIND | 06/07/12          |
| 177/186     | LIND | 06/08/12          |
| 122/175/306 | FOUL | 25/10/12-30/10/12 |
| 30/122      | FOUL | 05/11/12-06/11/12 |
| 30/218      | FOUL | 12/11/12-13/11/12 |

Supplementary Table 7. *Mycobacterium chimaera* global transmission clusters containing RBH isolates

| fastBAPS cluster | Transmission cluster | Total isolates (n) | Patients (n) | HCU (n) | Other (n) |
|------------------|----------------------|--------------------|--------------|---------|-----------|
| FB5              | FB5_1                | 21                 | 4            | 15      | 2         |
| FB5              | FB5_2                | 7                  | 7            | 0       | 0         |
| FB5              | FB5_3                | 5                  | 5            | 0       | 0         |
| FB5              | FB5_6                | 4                  | 4            | 0       | 0         |
| FB6_FB1          | FB6_FB1_1            | 489                | 230          | 258     | 1         |
| FB6_FB1          | FB6_FB1_2            | 6                  | 6            | 0       | 0         |
| FB6_FB1          | FB6_FB1_8            | 5                  | 5            | 0       | 0         |
| FB6_FB1          | FB6_FB1_21           | 4                  | 4            | 0       | 0         |
| FB6_FB2          | FB6_FB2_1            | 22                 | 22           | 0       | 0         |
| FB6_FB2          | FB6_FB2_2            | 36                 | 36           | 0       | 0         |
| FB6_FB2          | FB6_FB2_8            | 16                 | 16           | 0       | 0         |
| FB6_FB2          | FB6_FB2_17           | 10                 | 10           | 0       | 0         |

|         |            |    |    |   |   |
|---------|------------|----|----|---|---|
| FB6_FB2 | FB6_FB2_32 | 11 | 11 | 0 | 0 |
| FB6_FB2 | FB6_FB2_35 | 2  | 2  | 0 | 0 |
| FB6_FB4 | FB6_FB4_8  | 4  | 4  | 0 | 0 |
| FB6_FB4 | FB6_FB4_11 | 3  | 3  | 0 | 0 |
| FB6_FB4 | FB6_FB4_16 | 2  | 2  | 0 | 0 |

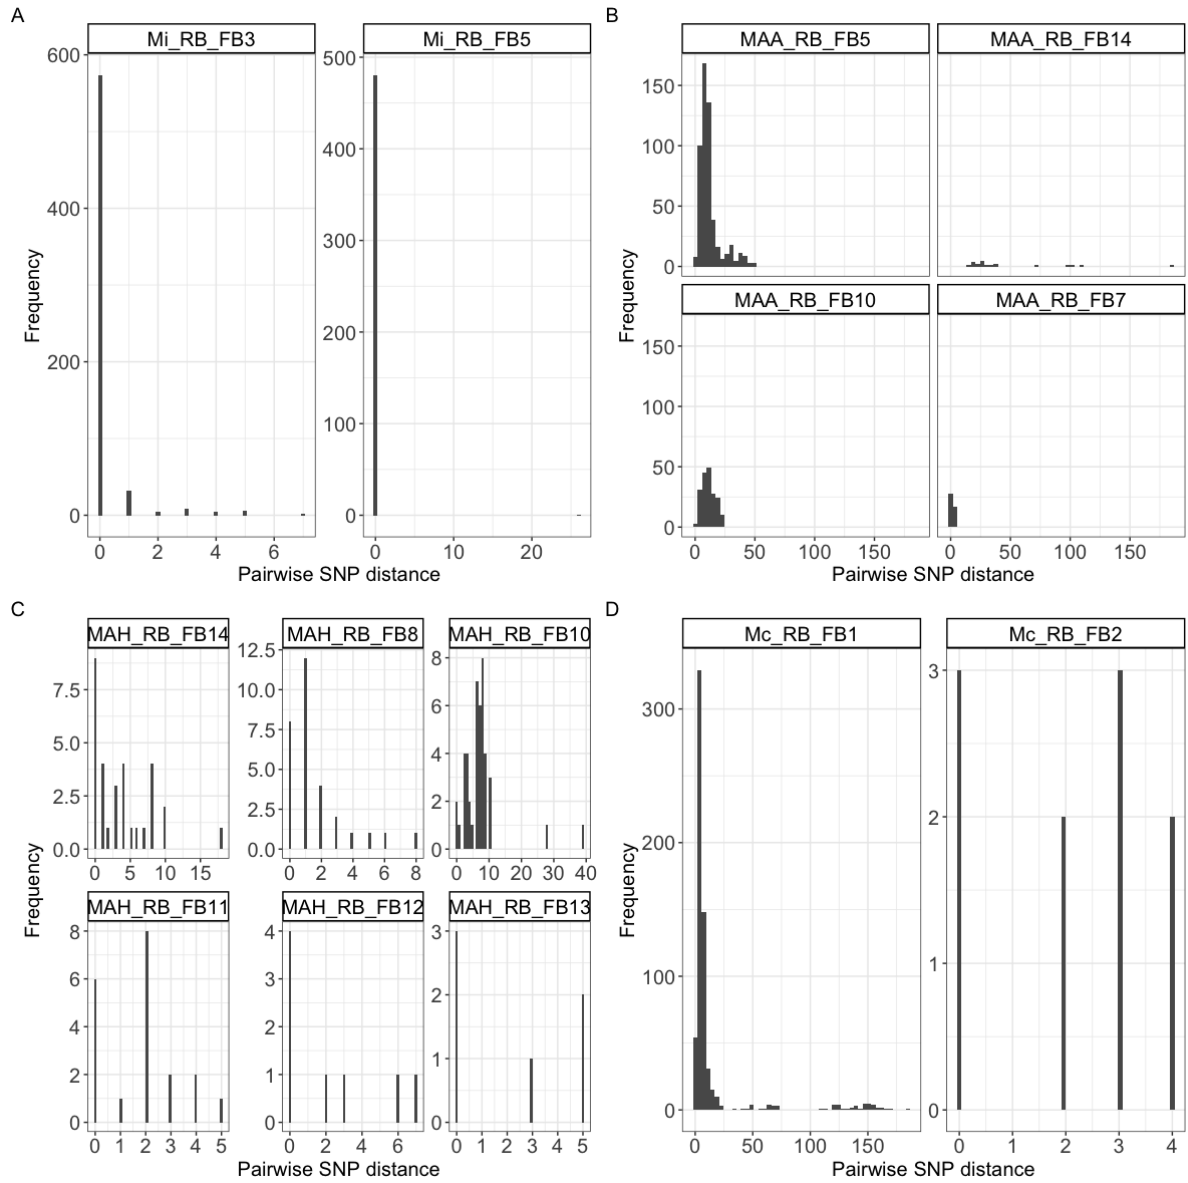

**Supplementary Figure 1. Within-host isolate pairwise SNP diversity in fastBAPS lineages** for A) *Mycobacterium intracellulare*; B) *Mycobacterium avium* subsp. *avium*; C) *Mycobacterium avium* subsp. *hominissuis* and D) *Mycobacterium chimaera*.

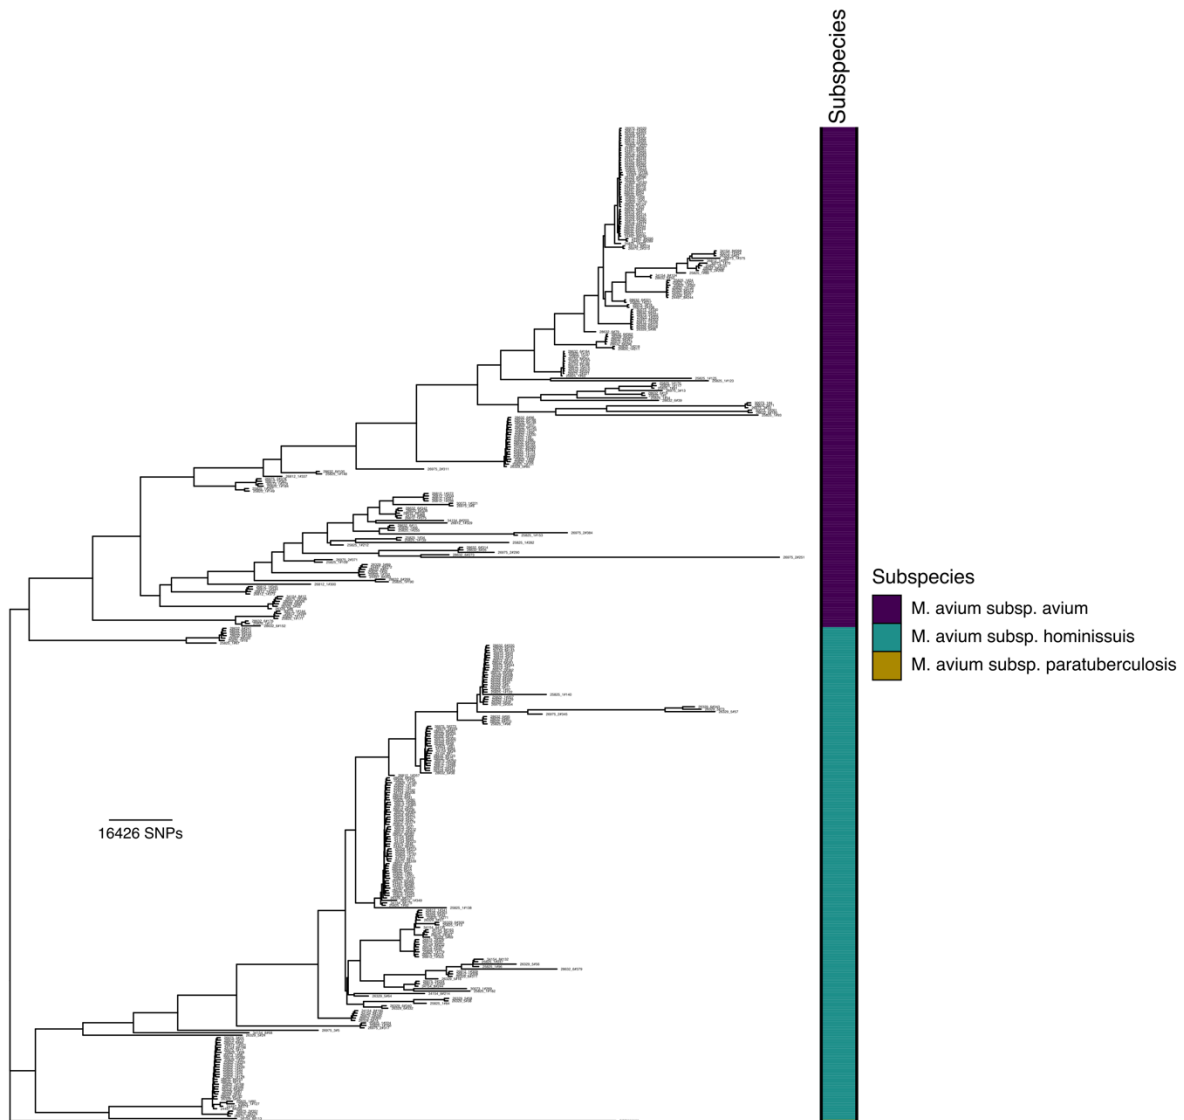

**Supplementary Figure 2. Population structure of *Mycobacterium avium* at the Royal Brompton Hospital.** Maximum likelihood phylogenetic tree of 406 *Mycobacterium avium* isolates rooted with a *Mycobacterium avium* subsp. *paratuberculosis* isolate (DRR263663).

The subspecies of each isolate is shown in the datastrip to the right of the phylogeny. The scale bar is shown in SNPs per site.

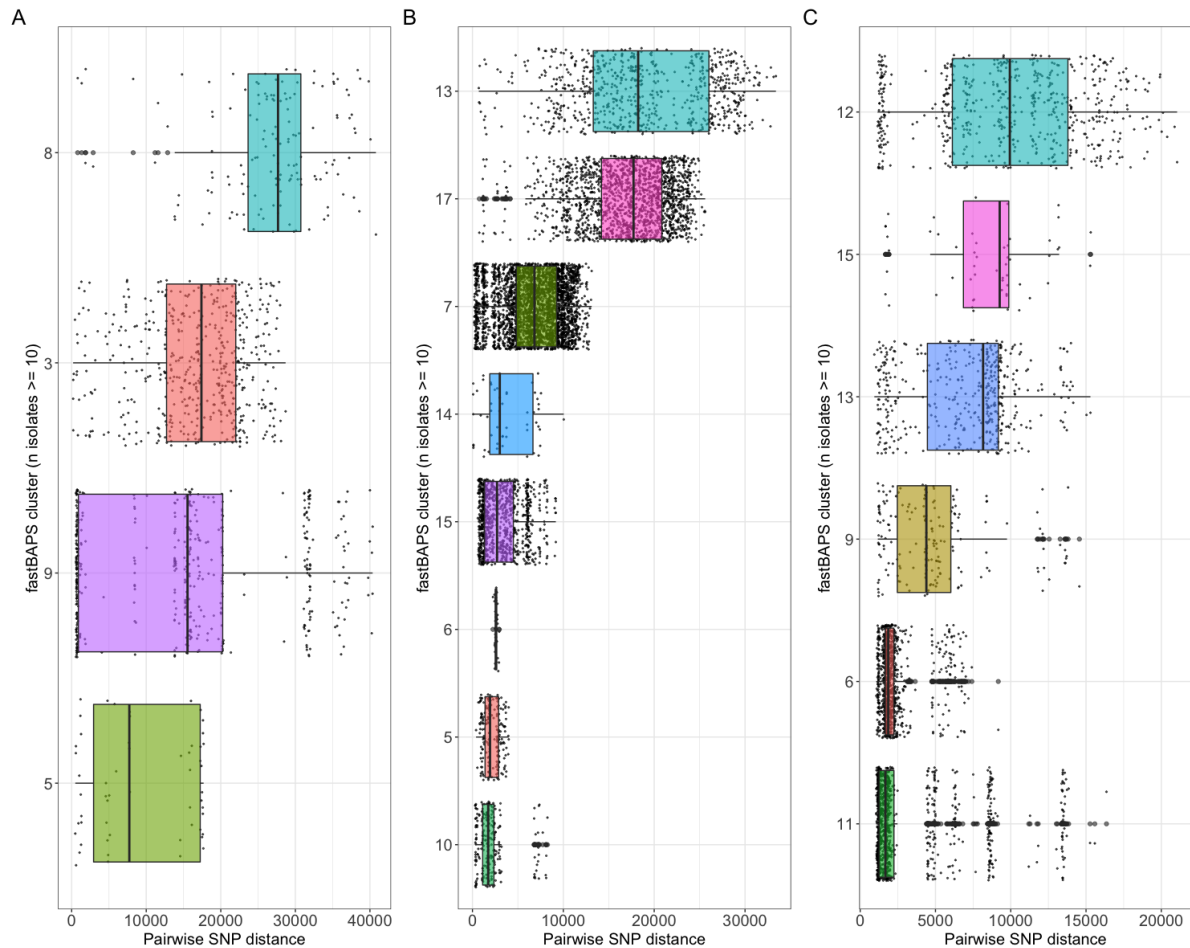

**Supplementary Figure 3. Global fastBAPS cluster pairwise SNP distance distributions.**

Boxplots showing isolate pairwise SNP distances for A) *Mycobacterium intracellulare*; B) *Mycobacterium avium* subsp. *avium* and C) *Mycobacterium avium* subsp. *hominissuis*

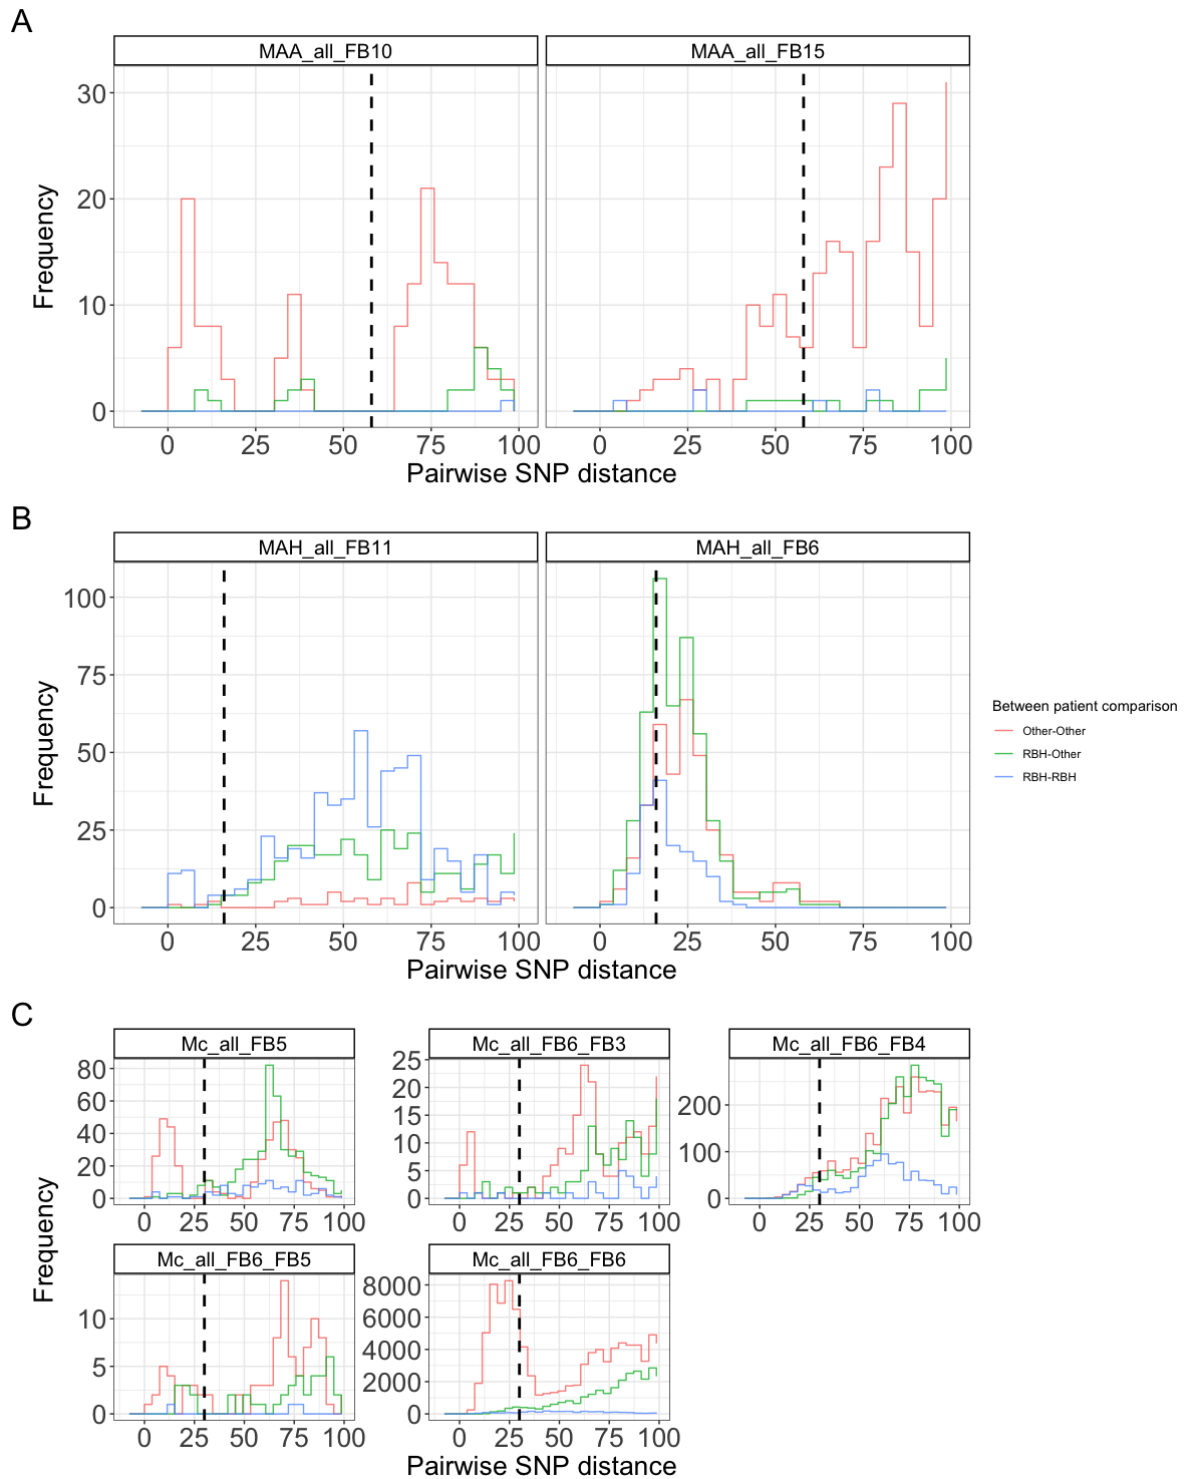

**Supplementary Figure 4: Distribution of pairwise SNP distances between isolates from the Royal Brompton Hospital and other studies.** Histograms showing distribution of

pairwise SNP distances for fastBAPS clusters for A) *Mycobacterium avium* subsp. *avium*; B) *Mycobacterium avium* subsp. *hominissuis* and C) *Mycobacterium chimaera*.
